# Supplementary material for: Convergent Evolution During Local Adaptation to Patchy Landscapes
Source: PubMed Central journal article supplement (PMC4646681; doi:10.1371/journal.pgen.1005630), 2015-11-16
Supplement: pgen.1005630.s001.pdf [file pgen.1005630.s001.pdf]

## Supporting Information

### The exact solution to the equilibrium frequency

Here we describe how to solve (24) exactly in one dimension, i.e., the Fisher-KPP equation with piecewise constant selection. Let  $p(t, x)$  be the proportion of the allele under spatially varying selection  $s(x)$  in one dimension, so that

$$\partial_t p(t, x) = \frac{\mu}{2} \sigma^2 \partial_x^2 p(t, x) + \mu s(x) p(t, x) (1 - p(t, x)).$$

The stable distribution  $\phi(x) = \lim_{t \rightarrow \infty} p(t, x)$  then solves

$$\partial_x^2 \phi(x) = -2s(x)\phi(x)(1 - \phi(x))/\sigma^2, \quad (60)$$

with appropriate boundary conditions. First rescale space by  $\sigma/\sqrt{2}$  so the  $\sigma^2/2$  term disappears. If we now assume that  $s(x)$  is piecewise constant,  $s(x) = s_i$  for  $x \in [x_i, x_{i+1})$ , with  $x_0 = -\infty$  and  $x_{n+2} = \infty$ , then the equation is integrable: if we multiply through by  $2\partial_x \phi(x)$  and integrate, then we get that

$$(\partial_x \phi(x))^2 = - \int^x 2s(x)\phi(x)(1 - \phi(x))\partial_x \phi(x) dx \quad (61)$$

$$= -s_i \phi(x)^2 \left(1 - \frac{2}{3}\phi(x)\right) - K_i \quad \text{for } x \in [x_i, x_{i+1}), \quad (62)$$

if we define

$$K_i = -s_i \phi(x_i)^2 \left(1 - \frac{2}{3}\phi(x_i)\right) - (\partial_x \phi(x_i))^2. \quad (63)$$

For ease of reference, we define

$$V_i(\phi) = s_i \phi^2 \left(1 - \frac{2}{3}\phi\right) + K_i.$$

Note that  $V_i'(0) = V_i'(1) = 0$ , that  $V_i(0) = K_i$  and  $V_i(1) = K_i + s_i/3$ . We will always have that  $V(\phi) \leq 0$ . (We have then that  $\partial_x^2 \phi = -\partial_\phi V(\phi)$ , the equation of motion of a particle in potential  $V$ . Also note that this implies ‘‘conservation of energy’’, i.e.,  $(\partial_x \phi(x))^2 + V(\phi(x))$  is constant.) Rearranging, we get that  $dx = d\phi/\sqrt{-V(\phi)}$ , so where  $\phi(x)$  is monotone, the inverse is

$$x(\phi) = x(\phi^*) \pm \int_{\phi^*}^{\phi} \frac{d\psi}{\sqrt{-V(\psi)}}.$$

For each  $i$  then define the elliptic function

$$F_i(\phi) = \int_{\phi_i^*}^{\phi} \frac{d\psi}{\sqrt{-V_i(\psi)}}, \quad (64)$$

where take the positive branch of the square root, and  $\phi_i^*$  will be chosen later. Then we have that  $x(\phi) - x(\phi_0) = \pm(F(\phi) - F(\phi_0))$ , or for an appropriate  $x_0$ ,

$$\phi(x) = F^{-1}(F(\phi(x_0)) \pm (x - x_0)).$$

We clearly want  $\lim_{x \rightarrow \infty} \partial_x \phi(\pm x) = 0$ , and  $\lim_{x \rightarrow \infty} \phi(\pm x)$  to be zero or one depending on the sign of  $s_0$  and  $s_{n+1}$ . Since  $(\partial_x \phi(x))^2 = -V(x)$ , this implies that if  $s_0 < 0$ , then  $K_0 = 0$ , while if  $s_0 > 0$  then  $K_0 = s_0/6$ ; and likewise for  $K_{n+1}$ .

We also require that  $\phi(x)$  and  $\phi'(x)$  are continuous. Continuity of  $\phi'(x)$  is equivalent to  $V_i(x_{i+1}) = V_{i+1}(x_{i+1})$ , which we can rearrange to find an equation for  $K_{i+1}$  in terms of  $K_i$  and  $\phi(x_{i+1})$ :

$$K_{i+1} - K_i = (s_i - s_{i+1})\phi(x_{i+1})^2(1 - 2\phi(x_{i+1})/3).$$

What about the frequency at the points the selection changes,  $\phi(x_i)$ ? Well, if  $\phi(x)$  is monotone on  $[x_i, x_{i+1})$  then we can without loss of generality take  $\phi_i^* = 0$  or 1 depending on the sign of  $s_i$ . Otherwise, let  $\phi_i^*$  be the (unique) root of  $V_i$  in  $[x_i, x_{i+1})$ , so  $V_i(\phi_i^*) = 0$ . In this case,  $\phi_i^*$  is the maximum or minimum of  $\phi$  in the interval: if  $s > 0$ , then  $\phi_i = \max\{\phi(x) : x \in [x_i, x_{i+1})\}$ . Recall we defined  $F_i$  using  $\phi_i^*$ ; now using the fact that  $\phi$  is monotone with the opposite sign on either side of  $\phi_i^*$ ,  $x_{i+1} - x_i = F_i(\phi(x_{i+1})) - F_i(\phi_i^*) + F_i(\phi(x_i)) - F_i(\phi_i^*)$ , and that  $F(\phi_i^*) = 0$ , we know that the length of the  $i$ th stretch is

$$x_{i+1} - x_i = \pm (F_i(\phi(x_i)) + F_i(\phi(x_{i+1}))).$$

Note that all the  $\pm$ 's are easily relatable to the signs of  $s_i$ . If we knew  $\phi(x_1)$  and  $\phi'(x_1)$ , then we'd be able to solve the equations for  $\phi(x_i)$  and  $K_i$  recursively upwards. In some cases, such as [9], we can infer  $\phi(0)$  and  $\partial_x \phi(0)$  by spatial symmetry. In other cases, we are only given  $\phi(-\infty)$  and  $\phi(\infty)$ , and have to work inwards from the ends.

## Doing the integrals

An important ingredient in the above method is the integral (64), to which a method for solving the Korteweg-de Vries equation can be applied [37]. Recall that  $V_i(\phi) = s_i \phi^2(1 - 2\phi/3) + K_i$ , with  $K_i = V_i(0)$  chosen to match  $V$  at the boundaries; since we're just working within an interval with  $s$  constant, we can rescale space by  $\sqrt{2s_i}/\sigma$ , so that  $s$  and  $\sigma$  drop from the equation. We then want to integrate

$$\int \frac{d\phi}{\sqrt{-V(\phi)}} = \int \frac{d\phi}{\sqrt{\phi^2(1 - 2\phi/3) + K}},$$

over a domain where  $V$  is always negative. Let  $\phi^2(1 - 2\phi/3) + K = (\alpha - \phi)(\phi - \beta)(\phi - \gamma)$ , and change variables first to  $y^2 = (\alpha - \phi)$ , and then to  $x = y/\sqrt{\alpha - \beta}$ , so that

$$\begin{aligned} \frac{d\phi}{\sqrt{\phi^2(1 - 2\phi/3) + K}} &= \frac{-2dy}{\sqrt{(\alpha - \beta - y^2)(\alpha - \gamma - y^2)}} \\ &= \frac{-2dx}{\sqrt{\alpha - \gamma} \sqrt{(1 - x^2)(1 - S^2 x^2)}}, \end{aligned}$$

with  $S^2 = (\alpha - \beta)/(\alpha - \gamma)$ . Now Jacobi's incomplete elliptic integral of the first kind is defined by

$$F(x; k) = \int_0^x \frac{dt}{\sqrt{(1 - t^2)(1 - k^2 t^2)}},$$

and the Jacobian elliptic function  $\text{sn}(x; k)$  is the inverse:  $F(\text{sn}(x; k); k) = x$ . As  $k \rightarrow 0$ ,  $\text{sn}(x; k) \rightarrow \sin(x)$ , while as  $k \rightarrow 1$ ,  $\text{sn}(x; k) \rightarrow \sinh(x)$ .

## More information about the simulations

In tables S1 and S2 we provide additional details regarding the simulations we used to validate the theory in figures 4 and 5.
