# Supplementary material for: Convergent Evolution During Local Adaptation to Patchy Landscapes
Source: PubMed Central journal article supplement (PMC4646681; doi:10.1371/journal.pgen.1005630), 2015-11-16

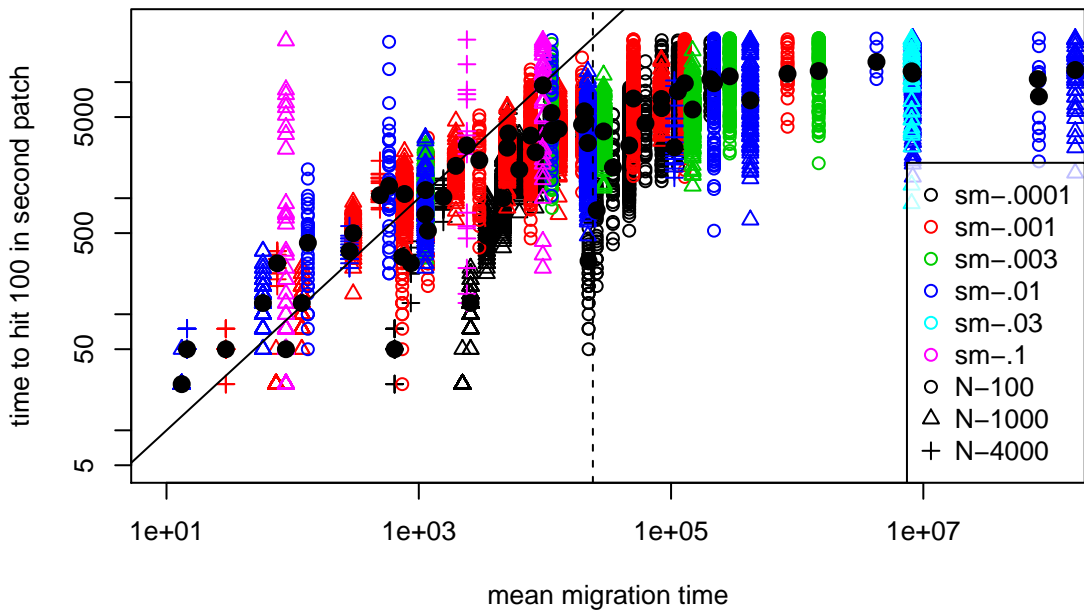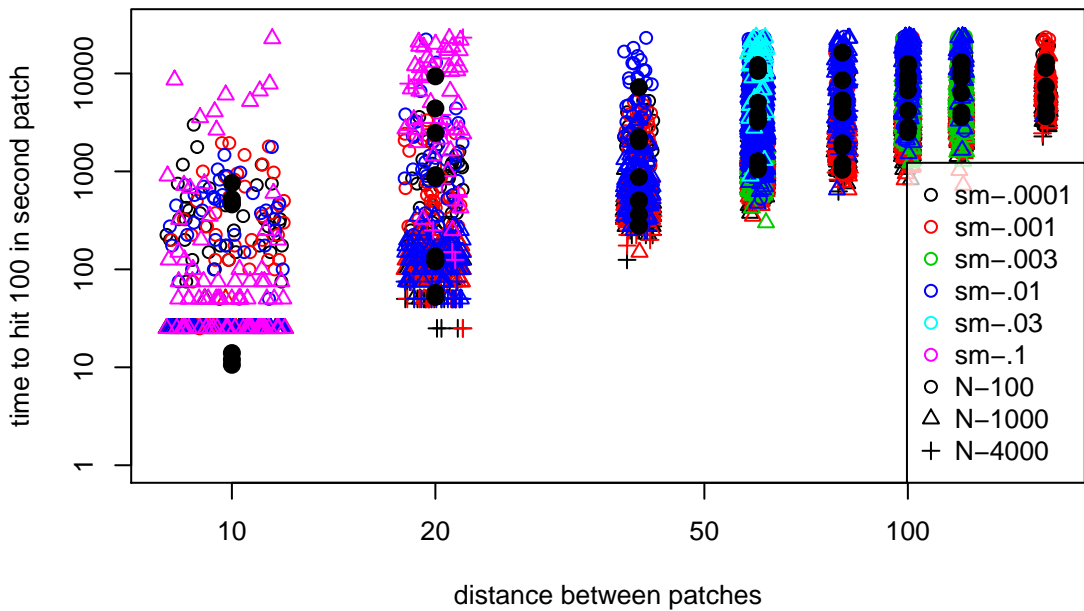

Supplement: pgen.1005630.s006.pdf [file pgen.1005630.s006.pdf]
