# Supplementary material for: Convergent Evolution During Local Adaptation to Patchy Landscapes
Source: PubMed Central journal article supplement (PMC4646681; doi:10.1371/journal.pgen.1005630), 2015-11-16

$\rho = 1200, \mu = 1e-05$

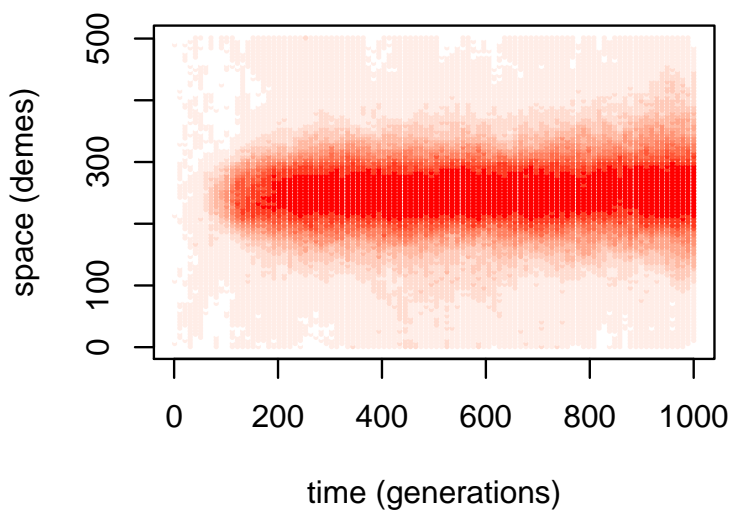

$s_m = 0.001, s_p = 0.00231$

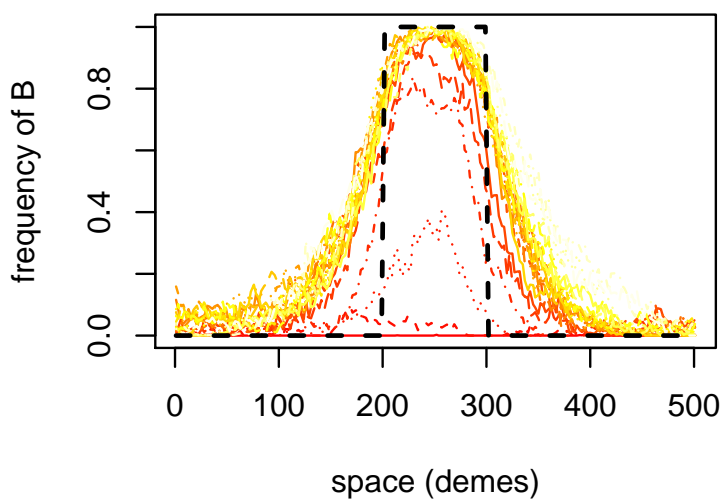

$\rho = 600, \mu = 1e-05$

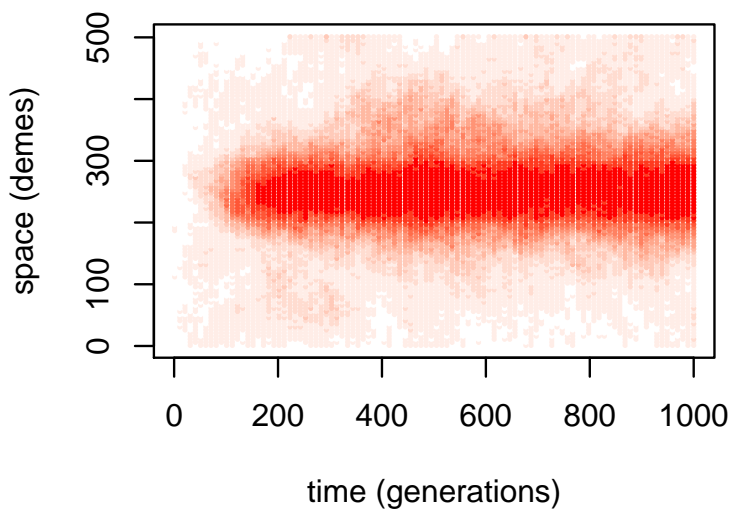

$s_m = 0.001, s_p = 0.00231$

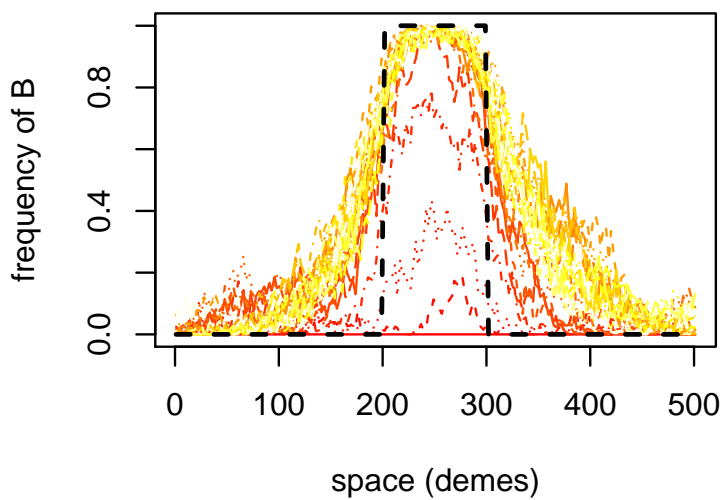

$\rho = 50, \mu = 1e-05$

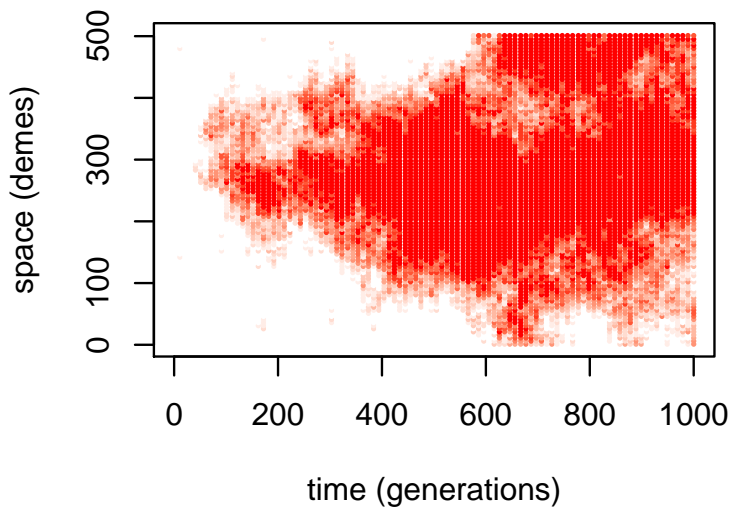

$s_m = 0.001, s_p = 0.00231$

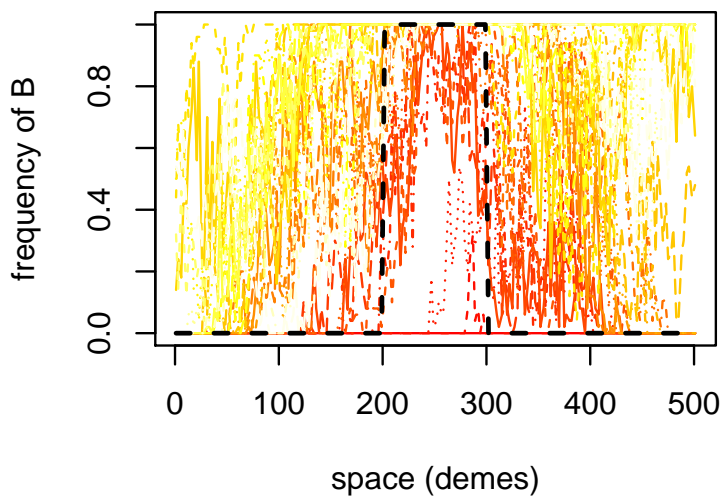

Supplement: pgen.1005630.s009.pdf [file pgen.1005630.s009.pdf]
