# Supplementary material for: Convergent Evolution During Local Adaptation to Patchy Landscapes
Source: PubMed Central journal article supplement (PMC4646681; doi:10.1371/journal.pgen.1005630), 2015-11-16

$\rho = 4000, R = 80$

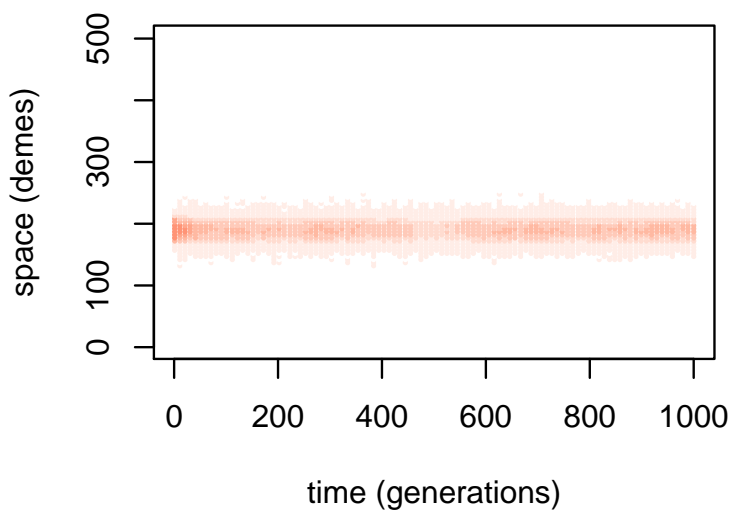

$s_m = 0.1, s_p = 0.00231$

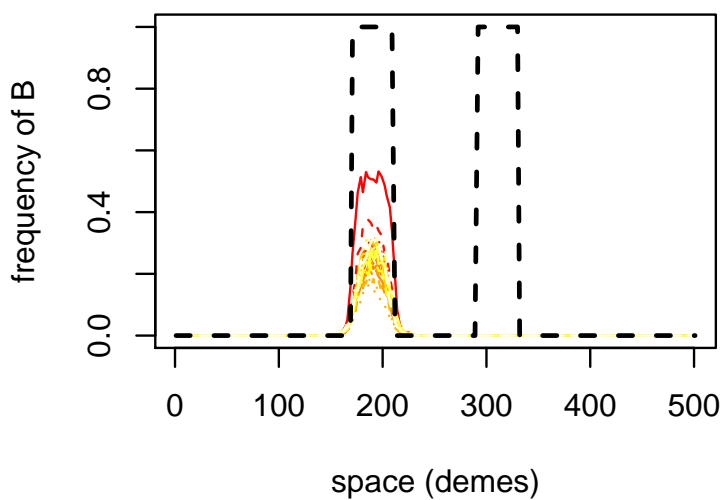

$\rho = 1000, R = 80$

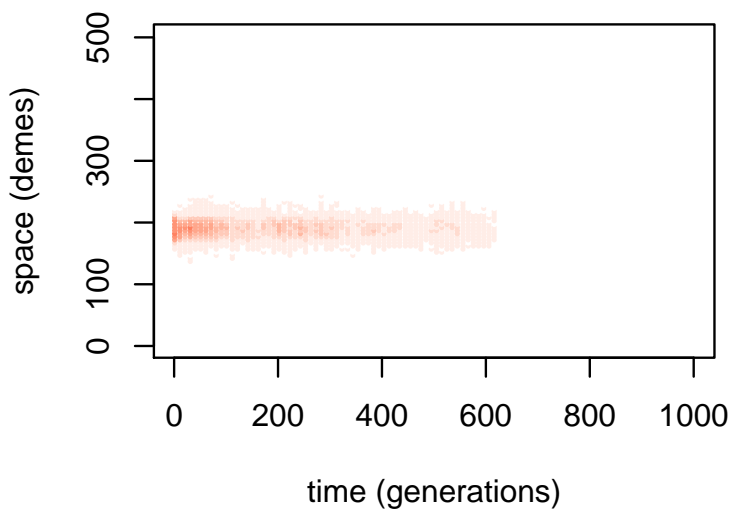

$s_m = 0.1, s_p = 0.00231$

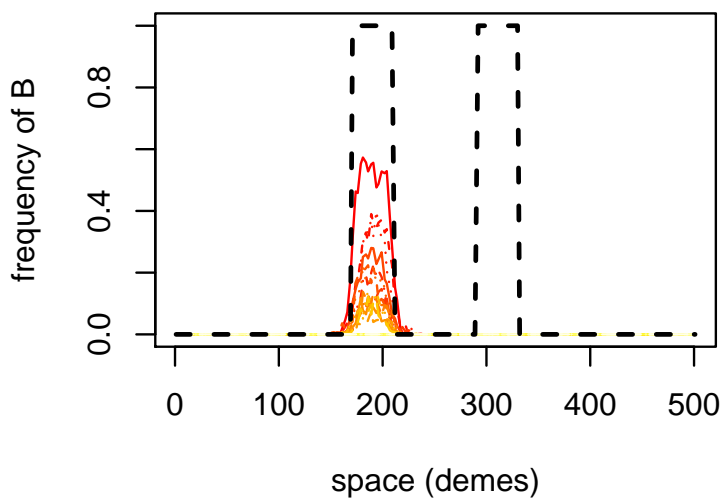

$\rho = 100, R = 80$

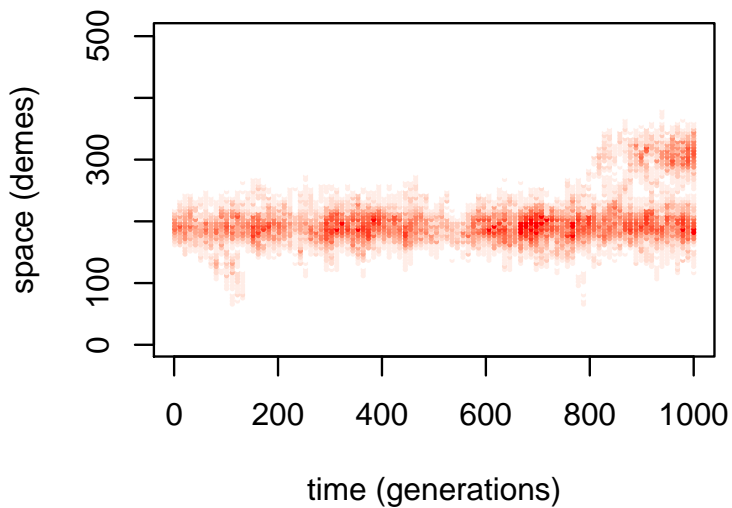

$s_m = 0.01, s_p = 0.00231$

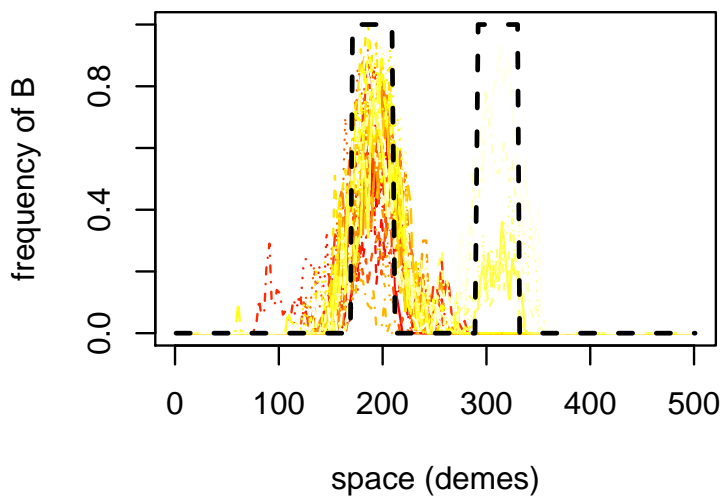

Supplement: pgen.1005630.s011.pdf [file pgen.1005630.s011.pdf]
